# Supplementary material for: Predictors of Indoor Radon Concentrations in Pennsylvania, 1989–2013
Source: PubMed Central journal article supplement (PMC4629742; doi:10.1289/ehp.1409014), 2015-04-09
Supplement: ehp.1409014.s001.acco.pdf [file ehp.1409014.s001.acco.pdf]

**Note to Readers:** *EHP* strives to ensure that all journal content is accessible to all readers. However, some figures and Supplemental Material published in *EHP* articles may not conform to 508 standards due to the complexity of the information being presented. If you need assistance accessing journal content, please contact [ehp508@niehs.nih.gov](mailto:ehp508@niehs.nih.gov). Our staff will work with you to assess and meet your accessibility needs within 3 working days.

## **Supplemental Material**

### **Predictors of Indoor Radon Concentrations in Pennsylvania, 1989–2013**

Joan A. Casey, Elizabeth L. Ogburn, Sara G. Rasmussen, Jennifer K. Irving, Jonathan Pollak,  
Paul A. Locke, and Brian S. Schwartz

#### **Table of Contents**

**Table S1.** Number of radon values per year by county category.

**Table S2.** Predictors and 95% confidence intervals of *ln*-transformed basement and first floor radon concentrations from a linear regression model fit using generalized estimating equations, 1989-2013.

**Table S3.** Predictors and 95% confidence intervals of *ln*-transformed basement radon concentrations from a linear regression model fit using generalized estimating equations including measurements from up to 4 test dates per building, 1989-2013.

**Table S4.** Predictors and 95% confidence intervals of *ln*-transformed basement radon concentrations from a linear regression model fit using generalized estimating equations including measurements from up to 4 test dates per building when the first basement radon test at the building was very high (i.e.,  $\geq 740$  Bq/m<sup>3</sup>), 1989-2013.

**Table S1.** Number of radon values per year by county category.

| Year         | County category       |             |                        |             |                         |            |               |            |              |            |                |            |
|--------------|-----------------------|-------------|------------------------|-------------|-------------------------|------------|---------------|------------|--------------|------------|----------------|------------|
|              | No Marcellus activity |             | Low Marcellus activity |             | High Marcellus activity |            | Reading Prong |            | Philadelphia |            | Total          |            |
|              | N                     | %           | N                      | %           | N                       | %          | N             | %          | N            | %          | N              | %          |
| 1989         | 11,268                | 59.8        | 4,397                  | 23.3        | 824                     | 4.4        | 1,590         | 8.4        | 775          | 4.1        | 18,854         | 100        |
| 1990         | 10,121                | 57.9        | 4,294                  | 24.5        | 737                     | 4.2        | 1,522         | 8.7        | 821          | 4.7        | 17,495         | 100        |
| 1991         | 11,909                | 61.7        | 4,492                  | 23.3        | 634                     | 3.3        | 1,336         | 6.9        | 943          | 4.9        | 19,314         | 100        |
| 1992         | 14,815                | 65.0        | 4,550                  | 20.0        | 608                     | 2.7        | 1,530         | 6.7        | 1291         | 5.7        | 22,794         | 100        |
| 1993         | 15,618                | 63.8        | 4,658                  | 19.0        | 747                     | 3.1        | 2,090         | 8.5        | 1363         | 5.6        | 24,476         | 100        |
| 1994         | 15,560                | 62.3        | 4,427                  | 17.7        | 1055                    | 4.2        | 2,515         | 10.1       | 1412         | 5.7        | 24,969         | 100        |
| 1995         | 17,282                | 61.8        | 4,984                  | 17.8        | 1885                    | 6.7        | 2,389         | 8.5        | 1432         | 5.1        | 27,972         | 100        |
| 1996         | 18,139                | 59.4        | 6,307                  | 20.6        | 2213                    | 7.2        | 2,398         | 7.8        | 1505         | 4.9        | 30,562         | 100        |
| 1997         | 19,798                | 62.8        | 6,251                  | 19.8        | 1769                    | 5.6        | 2,439         | 7.7        | 1256         | 4.0        | 31,513         | 100        |
| 1998         | 24,558                | 63.5        | 7,364                  | 19.0        | 2640                    | 6.8        | 2,704         | 7.0        | 1412         | 3.7        | 38,678         | 100        |
| 1999         | 21,373                | 60.5        | 7,472                  | 21.2        | 2398                    | 6.8        | 2,595         | 7.3        | 1480         | 4.2        | 35,318         | 100        |
| 2000         | 20,138                | 59.0        | 7,722                  | 22.6        | 2389                    | 7.0        | 2,565         | 7.5        | 1305         | 3.8        | 34,119         | 100        |
| 2001         | 20,145                | 57.6        | 8,643                  | 24.7        | 2633                    | 7.5        | 2,322         | 6.6        | 1252         | 3.6        | 34,995         | 100        |
| 2002         | 22,344                | 60.9        | 7,743                  | 21.1        | 2325                    | 6.3        | 2,663         | 7.3        | 1617         | 4.4        | 36,692         | 100        |
| 2003         | 22,438                | 58.0        | 8,671                  | 22.4        | 2645                    | 6.8        | 3,034         | 7.8        | 1910         | 4.9        | 38,698         | 100        |
| 2004         | 23,501                | 55.7        | 10,064                 | 23.9        | 3403                    | 8.1        | 3,379         | 8.0        | 1849         | 4.4        | 42,196         | 100        |
| 2005         | 26,064                | 53.9        | 12,166                 | 25.1        | 3781                    | 7.8        | 4,187         | 8.7        | 2190         | 4.5        | 48,388         | 100        |
| 2006         | 23,925                | 53.5        | 11,189                 | 25.0        | 3413                    | 7.6        | 3,826         | 8.6        | 2381         | 5.3        | 44,734         | 100        |
| 2007         | 24,610                | 52.9        | 10,901                 | 23.4        | 4002                    | 8.6        | 4,612         | 9.9        | 2435         | 5.2        | 46,560         | 100        |
| 2008         | 18,096                | 52.0        | 8,560                  | 24.6        | 3034                    | 8.7        | 3,220         | 9.3        | 1884         | 5.4        | 34,794         | 100        |
| 2009         | 21,774                | 49.6        | 10,846                 | 24.7        | 3976                    | 9.1        | 4,888         | 11.1       | 2413         | 5.5        | 43,897         | 100        |
| 2010         | 23,385                | 53.6        | 10,275                 | 23.6        | 4126                    | 9.5        | 3,628         | 8.3        | 2213         | 5.1        | 43,627         | 100        |
| 2011         | 22,122                | 53.1        | 10,035                 | 24.1        | 4108                    | 9.9        | 3,339         | 8.0        | 2028         | 4.9        | 41,632         | 100        |
| 2012         | 21,335                | 49.9        | 10,579                 | 24.8        | 4264                    | 10.0       | 3,955         | 9.3        | 2584         | 6.0        | 42,717         | 100        |
| 2013         | 21,157                | 50.7        | 10,360                 | 24.8        | 3958                    | 9.5        | 3,541         | 8.5        | 2725         | 6.5        | 41,741         | 100        |
| <b>Total</b> | <b>491,475</b>        | <b>56.7</b> | <b>196,950</b>         | <b>22.7</b> | <b>63567</b>            | <b>7.3</b> | <b>72,267</b> | <b>8.3</b> | <b>42476</b> | <b>4.9</b> | <b>866,735</b> | <b>100</b> |

**Table S2.** Predictors and 95% confidence intervals of *ln*-transformed basement and first floor radon concentrations from a linear regression model fit using generalized estimating equations, 1989-2013.

| <b>Variable</b>      | <b>Model 1A<sup>a</sup><br/>Coefficient (95% CI)</b> | <b>N</b> |
|----------------------|------------------------------------------------------|----------|
| <b>Year</b>          |                                                      |          |
| 1989                 | 0.054 (0.034, 0.074)                                 | 18,854   |
| 1990                 | -0.035 (-0.056, -0.015)                              | 17,495   |
| 1991                 | 0.037 (0.017, 0.058)                                 | 19,314   |
| 1992                 | -0.013 (-0.033, 0.006)                               | 22,794   |
| 1993                 | -0.006 (-0.025, 0.013)                               | 24,476   |
| 1994                 | 0.036 (0.018, 0.055)                                 | 24,969   |
| 1995                 | 0.120 (0.102, 0.137)                                 | 27,972   |
| 1996                 | 0.071 (0.054, 0.088)                                 | 30,562   |
| 1997                 | 0.048 (0.032, 0.065)                                 | 31,513   |
| 1998                 | 0.101 (0.085, 0.117)                                 | 38,678   |
| 1999                 | -0.003 (-0.019, 0.013)                               | 35,318   |
| 2000                 | Reference                                            | 34,119   |
| 2001                 | 0.021 (0.005, 0.037)                                 | 34,995   |
| 2002                 | 0.003 (-0.013, 0.019)                                | 36,692   |
| 2003                 | -0.067 (-0.082, -0.051)                              | 38,698   |
| 2004                 | -0.057 (-0.072, -0.042)                              | 42,196   |
| 2005                 | -0.019 (-0.033, -0.004)                              | 48,388   |
| 2006                 | 0.027 (0.012, 0.042)                                 | 44,734   |
| 2007                 | 0.040 (0.025, 0.055)                                 | 46,560   |
| 2008                 | 0.046 (0.030, 0.062)                                 | 34,794   |
| 2009                 | 0.103 (0.088, 0.118)                                 | 43,897   |
| 2010                 | 0.070 (0.055, 0.085)                                 | 43,627   |
| 2011                 | 0.083 (0.068, 0.099)                                 | 41,632   |
| 2012                 | 0.122 (0.107, 0.138)                                 | 42,717   |
| 2013                 | 0.073 (0.058, 0.088)                                 | 41,741   |
| <b>Test location</b> |                                                      |          |
| First floor          | Reference                                            | 160,937  |
| Basement             | 0.655 (0.651, 0.660)                                 | 705,798  |
| <b>Water source</b>  |                                                      |          |
| Municipal            | Reference                                            | 730,369  |
| Well water           | 0.191 (0.184, 0.198)                                 | 136,366  |
| <b>Building type</b> |                                                      |          |
| 2-Story              | Reference                                            | 372,012  |
| 3-Story              | 0.160 (0.151, 0.169)                                 | 77,845   |
| Apartment            | -0.313 (-0.351, -0.276)                              | 3,041    |
| Bi-level             | -0.082 (-0.099, -0.065)                              | 15,227   |
| Cape cod             | 0.057 (0.041, 0.073)                                 | 19,638   |
| Commercial           | -0.254 (-0.295, -0.212)                              | 2,644    |
| Contemporary         | 0.050 (0.022, 0.077)                                 | 6,124    |
| Public/school        | -0.211 (-0.303, -0.120)                              | 572      |
| Ranch                | 0.140 (0.132, 0.149)                                 | 78,710   |
| Split level          | -0.075 (-0.089, -0.060)                              | 23,610   |
| Townhouse            | -0.376 (-0.386, -0.366)                              | 59,611   |
| Trailer              | -0.542 (-0.655, -0.429)                              | 322      |

| <b>Variable</b>                                 | <b>Model 1A<sup>a</sup><br/>Coefficient (95% CI)</b> | <b>N</b> |
|-------------------------------------------------|------------------------------------------------------|----------|
| Unknown                                         | -0.130 (-0.137, -0.123)                              | 207,379  |
| <b>Test type</b>                                |                                                      |          |
| Activated charcoal                              | Reference                                            | 292,889  |
| Alpha track                                     | 0.242 (0.209, 0.276)                                 | 8,918    |
| Charcoal liquid scintillation                   | 0.206 (0.195, 0.216)                                 | 49,870   |
| Continuous                                      | 0.006 (-0.001, 0.013)                                | 224,641  |
| Electret ion chamber                            | 0.125 (0.118, 0.133)                                 | 290,417  |
| <b>Test duration</b>                            | -0.0001 (-0.0003, 0.0000)                            | 866,735  |
| <b>Season</b>                                   |                                                      |          |
| Spring                                          | Reference                                            | 244,917  |
| Summer                                          | 0.058 (0.004, 12.88)                                 | 214,327  |
| Autumn                                          | 0.156 (0.004, 43.67)                                 | 199,684  |
| Winter                                          | 0.077 (0.005, 15.4)                                  | 207,807  |
| <b>Average regional temperature (°F)</b>        | 0.0043 (0.0035, 0.0050)                              | 866,735  |
| <b>Average regional temperature<sup>2</sup></b> | -0.0009 (-0.0010, -0.0009)                           | 866,735  |
| <b>Average regional temperature<sup>3</sup></b> | -0.0001 (-0.0001, -0.0001)                           | 866,735  |
| <b>Average regional rainfall (in)</b>           | -0.0036 (-0.0042, -0.0030)                           | 866,735  |
| <b>Average regional rainfall<sup>2</sup></b>    | 0.0005 (0.0004, 0.0006)                              | 866,735  |
| <b>Average region rainfall<sup>3</sup></b>      | -0.00001 (-0.00001, -0.00001)                        | 866,735  |
| <b>Minor civil division</b>                     |                                                      |          |
| Township                                        | Reference                                            | 604,479  |
| Borough                                         | -0.132 (-0.139, -0.126)                              | 159,633  |
| City                                            | -0.323 (-0.333, -0.314)                              | 102,621  |
| <b>County</b>                                   |                                                      |          |
| Allegheny                                       | Reference                                            | 99,590   |
| Adams                                           | 0.582 (0.500, 0.665)                                 | 5,689    |
| Armstrong                                       | 0.372 (0.318, 0.427)                                 | 1,451    |
| Beaver                                          | 0.314 (0.289, 0.338)                                 | 9,380    |
| Bedford                                         | 0.342 (0.262, 0.422)                                 | 1,427    |
| Berks                                           | 0.749 (0.672, 0.827)                                 | 24,192   |
| Blair                                           | 0.167 (0.101, 0.233)                                 | 5,748    |
| Bradford                                        | -0.050 (-0.134, 0.034)                               | 1,776    |
| Bucks                                           | 0.466 (0.388, 0.544)                                 | 73,765   |
| Butler                                          | 0.292 (0.270, 0.314)                                 | 13,519   |
| Cambria                                         | 0.053 (0.024, 0.082)                                 | 5,688    |
| Cameron                                         | 0.247 (0.046, 0.447)                                 | 112      |
| Carbon                                          | 0.206 (0.139, 0.273)                                 | 3,521    |
| Centre                                          | 0.281 (0.210, 0.352)                                 | 12,264   |
| Chester                                         | 0.315 (0.237, 0.393)                                 | 70,735   |
| Clarion                                         | 0.351 (0.288, 0.414)                                 | 1,355    |
| Clearfield                                      | 0.470 (0.431, 0.509)                                 | 3,170    |
| Clinton                                         | 0.289 (0.209, 0.370)                                 | 1,425    |
| Columbia                                        | 0.541 (0.473, 0.609)                                 | 3,447    |
| Crawford                                        | 0.114 (0.027, 0.200)                                 | 2,090    |
| Cumberland                                      | 0.704 (0.627, 0.781)                                 | 22,335   |
| Dauphin                                         | 0.651 (0.578, 0.725)                                 | 20,671   |
| Delaware                                        | 0.147 (0.068, 0.225)                                 | 52,677   |
| Elk                                             | 0.653 (0.577, 0.729)                                 | 998      |
| Erie                                            | -0.146 (-0.252, -0.040)                              | 16,785   |
| Fayette                                         | -0.095 (-0.139, -0.051)                              | 2,126    |

| <b>Variable</b>                            | <b>Model 1A<sup>a</sup><br/>Coefficient (95% CI)</b> | <b>N</b> |
|--------------------------------------------|------------------------------------------------------|----------|
| Forest                                     | 0.497 (0.228, 0.765)                                 | 59       |
| Franklin                                   | 0.675 (0.595, 0.756)                                 | 6,897    |
| Fulton                                     | 0.551 (0.406, 0.696)                                 | 231      |
| Greene                                     | -0.089 (-0.194, 0.015)                               | 387      |
| Huntingdon                                 | 0.296 (0.208, 0.383)                                 | 1,168    |
| Indiana                                    | 0.153 (0.113, 0.193)                                 | 2,746    |
| Jefferson                                  | 0.407 (0.345, 0.469)                                 | 1,191    |
| Juniata                                    | 0.639 (0.544, 0.734)                                 | 743      |
| Lackawanna                                 | -0.062 (-0.119, -0.006)                              | 12,753   |
| Lancaster                                  | 0.939 (0.861, 1.017)                                 | 30,210   |
| Lawrence                                   | 0.235 (0.186, 0.284)                                 | 2,766    |
| Lebanon                                    | 1.129 (1.049, 1.208)                                 | 7,091    |
| Lehigh                                     | 0.610 (0.532, 0.689)                                 | 24,637   |
| Luzerne                                    | -0.077 (-0.132, -0.023)                              | 20,822   |
| Lycoming                                   | 0.417 (0.354, 0.481)                                 | 6,064    |
| McKean                                     | -0.078 (-0.191, 0.034)                               | 505      |
| Mercer                                     | 0.147 (0.091, 0.202)                                 | 3,342    |
| Mifflin                                    | 0.590 (0.508, 0.671)                                 | 1,312    |
| Monroe                                     | -0.301 (-0.368, -0.235)                              | 10,934   |
| Montgomery                                 | 0.341 (0.263, 0.418)                                 | 113,871  |
| Montour                                    | 0.383 (0.303, 0.463)                                 | 1,501    |
| Northampton                                | 0.521 (0.443, 0.600)                                 | 23,438   |
| Northumberland                             | 0.438 (0.373, 0.503)                                 | 4,165    |
| Perry                                      | 0.552 (0.478, 0.625)                                 | 2,032    |
| Philadelphia                               | 0.363 (0.284, 0.443)                                 | 42,476   |
| Pike                                       | -0.460 (-0.529, -0.391)                              | 7,775    |
| Potter                                     | 0.318 (0.225, 0.411)                                 | 728      |
| Schuylkill                                 | 0.599 (0.537, 0.660)                                 | 5,409    |
| Snyder                                     | 0.472 (0.398, 0.545)                                 | 2,022    |
| Somerset                                   | 0.068 (0.021, 0.115)                                 | 1,999    |
| Sullivan                                   | -0.265 (-0.442, -0.088)                              | 148      |
| Susquehanna                                | -0.233 (-0.313, -0.154)                              | 1,278    |
| Tioga                                      | -0.434 (-0.518, -0.350)                              | 1,346    |
| Union                                      | 0.508 (0.436, 0.580)                                 | 3,102    |
| Venango                                    | 0.490 (0.423, 0.556)                                 | 1,771    |
| Warren                                     | 0.441 (0.327, 0.555)                                 | 1,405    |
| Washington                                 | 0.016 (-0.008, 0.041)                                | 10,347   |
| Wayne                                      | -0.459 (-0.528, -0.390)                              | 4,875    |
| Westmoreland                               | 0.106 (0.089, 0.122)                                 | 19,594   |
| Wyoming                                    | -0.062 (-0.146, 0.021)                               | 1,084    |
| York                                       | 0.915 (0.837, 0.993)                                 | 26,575   |
| <b>Geologic formation name<sup>b</sup></b> |                                                      |          |
| Stockton formation <sup>c</sup>            | Reference                                            | 62,026   |
| Primary lithology: Albite-chlorite schist  |                                                      |          |
| Octoraro Formation                         | 0.613 (0.592, 0.634)                                 | 18071    |
| Primary lithology: Andesite                |                                                      |          |
| Jonestown Volcanic Suite                   | 0.178 (-0.212, 0.568)                                | 27       |
| Primary lithology: Anorthosite             |                                                      |          |
| Anorthosite                                | -0.280 (-0.349, -0.212)                              | 991      |
| Anorthosite                                | -0.025 (-0.132, 0.083)                               | 389      |

| <b>Variable</b>                                             | <b>Model 1A<sup>a</sup><br/>Coefficient (95% CI)</b> | <b>N</b> |
|-------------------------------------------------------------|------------------------------------------------------|----------|
| Primary lithology: Argillaceous dolomite                    |                                                      |          |
| Vintage Formation                                           | 0.335 (0.289, 0.380)                                 | 2412     |
| Primary lithology: Argillaceous limestone                   |                                                      |          |
| Chambersburg Formation                                      | 0.538 (0.455, 0.620)                                 | 686      |
| Hershey and Myerstown Formations, undivided                 | 0.354 (0.272, 0.436)                                 | 663      |
| Hershey Formation through Annville Formation, undivided     | 0.805 (0.478, 1.132)                                 | 38       |
| Limestone of Martinsburg Formation                          | 0.378 (0.328, 0.428)                                 | 2433     |
| Primary lithology: Argillaceous shale                       |                                                      |          |
| Girard Shale                                                | 0.573 (0.453, 0.692)                                 | 8147     |
| Primary lithology: Argillite                                |                                                      |          |
| Lockatong Formation                                         | 0.147 (0.130, 0.164)                                 | 24068    |
| Primary lithology: Arkosic sandstone                        |                                                      |          |
| New Oxford Formation                                        | -0.050 (-0.084, -0.017)                              | 5646     |
| Sedimentary strata at Jacksonwald and Aspers                | 0.178 (-0.036, 0.392)                                | 89       |
| Primary lithology: Black shale                              |                                                      |          |
| Marcellus Formation                                         | 1.078 (0.996, 1.159)                                 | 1960     |
| Primary lithology: Calcareous sandstone                     |                                                      |          |
| Decker Formation through Poxono Island Formation, undivided | 0.654 (0.461, 0.846)                                 | 127      |
| Primary lithology: Calcareous shale                         |                                                      |          |
| Elbrook Formation                                           | 0.257 (0.227, 0.287)                                 | 6798     |
| Onondaga and Old Port Formations, undivided                 | 0.605 (0.529, 0.680)                                 | 1967     |
| Onondaga Formation                                          | 0.660 (0.337, 0.982)                                 | 42       |
| Wills Creek Formation                                       | 0.309 (0.239, 0.379)                                 | 3545     |
| Primary lithology: Diabase                                  |                                                      |          |
| Peters Creek Schist                                         | 0.652 (0.601, 0.703)                                 | 1840     |
| Primary lithology:                                          |                                                      |          |
| Diabase                                                     | -0.297 (-0.331, -0.263)                              | 4450     |
| Primary lithology: Dolomite                                 |                                                      |          |
| Allentown Formation                                         | 0.414 (0.385, 0.443)                                 | 23089    |
| Bellefonte and Axemann Formations, undivided                | 0.464 (0.301, 0.626)                                 | 159      |
| Bellefonte Formation                                        | 1.257 (1.172, 1.342)                                 | 2788     |
| Gatesburg Formation                                         | 0.934 (0.781, 1.087)                                 | 210      |
| Ledger Formation                                            | 0.246 (0.217, 0.276)                                 | 6733     |
| Leithsville Formation                                       | 0.329 (0.291, 0.367)                                 | 4725     |
| Lower Cambrian rocks, undivided                             | 0.705 (0.634, 0.775)                                 | 924      |
| Mines Member of Gatesburg Formation                         | 1.071 (0.953, 1.189)                                 | 567      |
| Nittany and Stonehenge/Larke Formations, undivided          | 1.295 (1.158, 1.432)                                 | 282      |
| Nittany Formation                                           | 1.169 (1.078, 1.260)                                 | 2056     |
| Ontelaunee Formation                                        | 0.666 (0.621, 0.712)                                 | 2582     |
| Pinesburg Station Formation                                 | 0.670 (0.598, 0.741)                                 | 963      |
| Richland Formation                                          | 0.509 (0.461, 0.556)                                 | 2390     |
| Rickenbach Formation                                        | 0.438 (0.389, 0.486)                                 | 2411     |
| Snitz Creek Formation                                       | 0.505 (0.407, 0.604)                                 | 440      |
| Tomstown Formation                                          | 0.206 (0.144, 0.268)                                 | 1306     |
| Zooks Corner Formation                                      | 0.387 (0.346, 0.428)                                 | 3360     |
| Primary lithology: Feldspathic quartz sand                  |                                                      |          |
| Pensauken and Bridgeton Formations, undifferentiated        | -0.152 (-0.171, -0.133)                              | 23651    |
| Primary lithology: Feldspathic quartzite                    |                                                      |          |
| Setters Quartzite                                           | 0.200 (0.118, 0.282)                                 | 703      |

| <b>Variable</b>                                                                         | <b>Model 1A<sup>a</sup><br/>Coefficient (95% CI)</b> | <b>N</b> |
|-----------------------------------------------------------------------------------------|------------------------------------------------------|----------|
| Primary lithology: Felsic gneiss                                                        |                                                      |          |
| Felsic and intermediate gneiss                                                          | 0.220 (0.190, 0.251)                                 | 6644     |
| Felsic and intermediate gneiss                                                          | -0.035 (-0.063, -0.006)                              | 7420     |
| Felsic gneiss                                                                           | -0.175 (-0.193, -0.156)                              | 19922    |
| Felsic to mafic gneiss                                                                  | 0.600 (0.561, 0.640)                                 | 3692     |
| Primary lithology: Ferruginous clay                                                     |                                                      |          |
| Patapsco Formation                                                                      | 0.129 (0.046, 0.213)                                 | 677      |
| Primary lithology: Granitic gneiss                                                      |                                                      |          |
| Granitic gneiss and granite                                                             | 0.130 (0.103, 0.158)                                 | 7905     |
| Primary lithology: Granitic pegmatite                                                   |                                                      |          |
| Pegmatite                                                                               | 0.008 (-0.167, 0.184)                                | 151      |
| Primary lithology: Graphitic felsic gneiss                                              |                                                      |          |
| Graphitic felsic gneiss                                                                 | 0.307 (0.247, 0.368)                                 | 1315     |
| Primary lithology: Graphitic gneiss                                                     |                                                      |          |
| Graphitic felsic gneiss                                                                 | 0.252 (0.213, 0.290)                                 | 3476     |
| Primary lithology: Graphitic marble                                                     |                                                      |          |
| Franklin Marble                                                                         | 1.607 (1.452, 1.762)                                 | 197      |
| Primary lithology: Gravelly sand                                                        |                                                      |          |
| Bryn Mawr Formation                                                                     | -0.089 (-0.120, -0.057)                              | 6169     |
| Trenton Gravel                                                                          | -0.192 (-0.215, -0.168)                              | 15202    |
| Primary lithology: Graywacke                                                            |                                                      |          |
| Graywacke and shale of Martinsburg Formation                                            | 0.705 (0.659, 0.750)                                 | 3037     |
| Graywacke of Hamburg sequence                                                           | 0.458 (0.406, 0.510)                                 | 2126     |
| Primary lithology: Greenstone schist                                                    |                                                      |          |
| Greenstone schist                                                                       | 0.323 (0.064, 0.581)                                 | 60       |
| Primary lithology: High-calcium limestone                                               |                                                      |          |
| Annvile Formation                                                                       | 1.158 (0.986, 1.329)                                 | 159      |
| Primary lithology: Limestone                                                            |                                                      |          |
| Axemann Formation                                                                       | 1.261 (1.166, 1.356)                                 | 1507     |
| Beekmantown Group                                                                       | 0.263 (0.212, 0.315)                                 | 2118     |
| Benner Formation through Loysburg Formation, undivided                                  | 1.063 (0.961, 1.165)                                 | 885      |
| Buffalo Springs Formation                                                               | 0.284 (0.236, 0.332)                                 | 2207     |
| Coburn Formation through Loysburg Formation, undivided                                  | 0.671 (0.529, 0.814)                                 | 262      |
| Coburn Formation through Nealmont Formation, undivided                                  | 0.624 (0.510, 0.739)                                 | 540      |
| Conestoga Formation                                                                     | 0.116 (0.095, 0.138)                                 | 18466    |
| Epler Formation                                                                         | 0.568 (0.540, 0.597)                                 | 11527    |
| Keyser and Tonoloway Formations, undivided                                              | 0.585 (0.517, 0.654)                                 | 5139     |
| Keyser Formation through Clinton Group, undivided                                       | 0.355 (-0.249, 0.960)                                | 11       |
| Keyser Formation through Mifflintown Formation, undivided                               | 0.349 (0.214, 0.484)                                 | 314      |
| Limestone of Hamburg sequence                                                           | 0.383 (0.314, 0.453)                                 | 1015     |
| Millbach and Schaefferstown Formations, undivided                                       | 0.495 (0.360, 0.630)                                 | 237      |
| Millbach Formation                                                                      | 0.333 (0.277, 0.388)                                 | 1556     |
| Monongahela Group                                                                       | 0.505 (0.426, 0.583)                                 | 42447    |
| Rockdale Run Formation                                                                  | 0.769 (0.726, 0.811)                                 | 4193     |
| Shadygrove Formation                                                                    | 0.763 (0.681, 0.846)                                 | 708      |
| Shriver, Mandata, Corriganville, and New Creek Members of Old Port Formation, undivided | 0.851 (-0.043, 1.745)                                | 5        |
| Snitz Creek and Buffalo Springs Formations, undivided                                   | 0.479 (0.390, 0.568)                                 | 559      |
| St. Paul Group                                                                          | 0.709 (0.667, 0.751)                                 | 4074     |
| Stonehenge Formation                                                                    | 0.703 (0.659, 0.746)                                 | 2913     |

| <b>Variable</b>                                        | <b>Model 1A<sup>a</sup><br/>Coefficient (95% CI)</b> | <b>N</b> |
|--------------------------------------------------------|------------------------------------------------------|----------|
| Stonehenge/Larke Formation                             | 1.386 (1.288, 1.485)                                 | 1245     |
| Warrior Formation                                      | 0.694 (0.451, 0.936)                                 | 75       |
| Zullinger Formation                                    | 0.623 (0.564, 0.682)                                 | 1558     |
| Primary lithology: Limestone conglomerate              |                                                      |          |
| Limestone fanglomerate                                 | 0.328 (0.252, 0.404)                                 | 771      |
| Primary lithology: Mafic gneiss                        |                                                      |          |
| Banded mafic gneiss                                    | 0.378 (0.317, 0.438)                                 | 1274     |
| Hornblende gneiss                                      | 0.321 (0.252, 0.390)                                 | 1006     |
| Mafic gneiss                                           | -0.008 (-0.055, 0.040)                               | 2212     |
| Mafic gneiss                                           | -0.243 (-0.298, -0.189)                              | 1678     |
| Mafic gneiss                                           | -0.104 (-0.157, -0.052)                              | 1857     |
| Mafic gneiss                                           | -0.188 (-0.236, -0.139)                              | 2235     |
| Primary lithology: Marble                              |                                                      |          |
| Cockeysville Marble                                    | 0.234 (0.112, 0.356)                                 | 309      |
| Primary lithology: Metabasalt                          |                                                      |          |
| Metabasalt                                             | -0.322 (-0.440, -0.203)                              | 307      |
| Sams Creek Metabasalt                                  | 0.266 (0.117, 0.415)                                 | 187      |
| Primary lithology: Metadiabase                         |                                                      |          |
| Metadiabase                                            | 0.172 (0.044, 0.300)                                 | 292      |
| Primary lithology: Metarhyolite                        |                                                      |          |
| Metarhyolite                                           | 0.600 (0.507, 0.693)                                 | 510      |
| Primary lithology: Mudstone                            |                                                      |          |
| Brunswick Formation                                    | 0.026 (0.012, 0.040)                                 | 48260    |
| Lock Haven Formation                                   | 0.900 (0.823, 0.978)                                 | 3685     |
| Sherman Creek Member of Catskill Formation             | 0.917 (0.850, 0.983)                                 | 2420     |
| Primary lithology: Oligoclase-mica schist              |                                                      |          |
| Glenarm Wissahickon formation                          | 0.096 (0.073, 0.120)                                 | 13493    |
| Wissahickon Formation                                  | 0.120 (0.104, 0.136)                                 | 57742    |
| Primary lithology: Phyllite                            |                                                      |          |
| Harpers Formation                                      | 0.087 (-0.004, 0.177)                                | 531      |
| Marburg Schist                                         | 0.756 (0.715, 0.797)                                 | 3422     |
| Primary lithology: Quartz conglomerate                 |                                                      |          |
| Gettysburg conglomerate                                | 0.028 (-0.043, 0.099)                                | 910      |
| Hammer Creek conglomerate                              | -0.067 (-0.124, -0.009)                              | 1432     |
| New Oxford conglomerate                                | -0.021 (-0.173, 0.130)                               | 178      |
| Quartz fanglomerate                                    | 0.098 (0.030, 0.166)                                 | 1027     |
| Stockton conglomerate                                  | 0.082 (0.000, 0.165)                                 | 758      |
| Primary lithology: Quartzite                           |                                                      |          |
| Antietam and Harpers Formations, undivided             | 0.525 (0.491, 0.558)                                 | 5517     |
| Antietam Formation                                     | 0.448 (0.389, 0.507)                                 | 1342     |
| Chickies Formation                                     | 0.129 (0.104, 0.153)                                 | 10112    |
| Hardyston Formation                                    | 0.322 (0.266, 0.378)                                 | 1612     |
| Montalto Member of Harpers Formation                   | -0.199 (-0.349, -0.050)                              | 195      |
| Tuscarora Formation                                    | 0.466 (0.268, 0.663)                                 | 113      |
| Weverton and Loudoun Formations, undivided             | -0.312 (-0.569, -0.055)                              | 62       |
| Primary lithology: Sandstone                           |                                                      |          |
| Allegheny Formation                                    | 0.371 (0.296, 0.447)                                 | 11226    |
| Bald Eagle Formation                                   | 0.584 (0.335, 0.834)                                 | 70       |
| Berea Sandstone through Riceville Formation, undivided | 0.271 (0.135, 0.408)                                 | 507      |
| Berea Sandstone through Venango Formation, undivided   | 0.212 (0.082, 0.342)                                 | 547      |



| <b>Variable</b>                                                      | <b>Model 1A<sup>a</sup><br/>Coefficient (95% CI)</b> | <b>N</b> |
|----------------------------------------------------------------------|------------------------------------------------------|----------|
| Burgoon Sandstone                                                    | 0.716 (0.522, 0.910)                                 | 124      |
| Burgoon Sandstone through Cuyahoga Group, undifferentiated           | 0.339 (0.050, 0.628)                                 | 54       |
| Catskill Formation                                                   | 0.596 (0.534, 0.659)                                 | 12168    |
| Clarks Ferry Member of Catskill Formation                            | 1.475 (1.020, 1.931)                                 | 20       |
| Corry Sandstone through Riceville Formation, undivided               | 0.384 (0.227, 0.540)                                 | 259      |
| Duncannon Member of Catskill Formation                               | 0.337 (0.270, 0.405)                                 | 3858     |
| Foreknobs Formation                                                  | 0.546 (0.377, 0.716)                                 | 167      |
| Greene Formation                                                     | 0.747 (0.629, 0.865)                                 | 561      |
| Hammer Creek Formation                                               | -0.205 (-0.253, -0.158)                              | 2194     |
| Huntley Mountain Formation                                           | 0.803 (0.653, 0.953)                                 | 230      |
| Juniata Formation                                                    | 0.362 (0.110, 0.614)                                 | 68       |
| Llewellyn Formation                                                  | 0.330 (0.270, 0.391)                                 | 20309    |
| Long Run and Walcksville Members of Catskill Formation, undivided    | 0.781 (0.709, 0.852)                                 | 7272     |
| Long Run Member of Catskill Formation                                | 0.991 (0.913, 1.068)                                 | 2123     |
| Lower members of Gatesburg Formation, undivided                      | 0.920 (0.829, 1.011)                                 | 2124     |
| Packerton Member of Catskill Formation                               | 0.643 (0.482, 0.803)                                 | 199      |
| Pocono Formation                                                     | 0.375 (0.246, 0.503)                                 | 303      |
| Poplar Gap and Packerton Members of Catskill Formation, undivided    | 0.551 (0.476, 0.626)                                 | 3362     |
| Poplar Gap Member of Catskill Formation                              | 0.370 (0.290, 0.450)                                 | 2019     |
| Pottsville Formation                                                 | 0.373 (0.304, 0.442)                                 | 9077     |
| Ridgeley Formation through Coeymans Formation, undivided             | 0.926 (0.774, 1.078)                                 | 221      |
| Ridgeley Member of Old Port Formation                                | 0.536 (0.344, 0.728)                                 | 141      |
| Shawangunk Formation                                                 | 0.459 (0.052, 0.866)                                 | 25       |
| Shenango Formation                                                   | 0.269 (0.165, 0.372)                                 | 849      |
| Shenango Formation through Oswayo Formation, undivided               | -0.119 (-0.274, 0.037)                               | 251      |
| Shenango Formation through Riceville Formation, undivided            | 0.341 (0.036, 0.647)                                 | 54       |
| Spechty Kopf Formation                                               | 0.512 (0.344, 0.680)                                 | 161      |
| Towamensing Member of Catskill Formation                             | 0.929 (0.841, 1.017)                                 | 1244     |
| Walcksville and Towamensing Members of Catskill Formation, undivided | 1.004 (0.806, 1.203)                                 | 117      |
| Walcksville Member of Catskill Formation                             | 1.210 (1.111, 1.309)                                 | 752      |
| Washington Formation                                                 | 0.430 (0.335, 0.525)                                 | 1694     |
| Waynesburg Formation                                                 | 0.493 (0.412, 0.573)                                 | 11979    |
| Primary lithology: Serpentinite                                      |                                                      |          |
| Ultramafic rocks                                                     | 0.166 (0.117, 0.215)                                 | 2094     |
| Primary lithology: Shale                                             |                                                      |          |
| Bloomsburg and Mifflintown Formations, undivided                     | 0.284 (0.210, 0.358)                                 | 2500     |
| Bloomsburg Formation                                                 | 0.482 (0.365, 0.599)                                 | 392      |
| Casselman Formation                                                  | 0.734 (0.656, 0.812)                                 | 55531    |
| Clinton Group                                                        | 0.376 (0.298, 0.454)                                 | 1804     |
| Cocalico Formation                                                   | 0.807 (0.764, 0.849)                                 | 3065     |
| Glenshaw Formation                                                   | 0.611 (0.534, 0.689)                                 | 49486    |
| Hamburg sequence rocks                                               | 0.682 (0.653, 0.712)                                 | 18260    |
| Hamilton Group                                                       | 0.431 (0.367, 0.495)                                 | 7345     |
| Heidlersburg Member of Gettysburg Formation                          | 0.117 (0.028, 0.207)                                 | 594      |
| Kinzers Formation                                                    | 0.398 (0.350, 0.447)                                 | 2076     |
| Mahantango Formation                                                 | 1.005 (0.927, 1.082)                                 | 2338     |
| Martinsburg Formation                                                | 0.682 (0.651, 0.713)                                 | 11148    |
| Mauch Chunk Formation                                                | 0.663 (0.607, 0.720)                                 | 5632     |
| Northeast Shale                                                      | 0.519 (0.398, 0.640)                                 | 4263     |

| <b>Variable</b>                                                | <b>Model 1A<sup>a</sup><br/>Coefficient (95% CI)</b> | <b>N</b>       |
|----------------------------------------------------------------|------------------------------------------------------|----------------|
| Onondaga Formation through Poxono Island Formation, undivided  | 0.496 (0.331, 0.660)                                 | 183            |
| Reedsville Formation                                           | 0.713 (0.589, 0.837)                                 | 375            |
| Shale and graywacke of Hamburg sequence                        | 0.899 (0.842, 0.956)                                 | 1524           |
| Waynesboro Formation                                           | 0.350 (0.267, 0.433)                                 | 698            |
| Primary lithology: Shaly limestone                             |                                                      |                |
| Jacksonburg Formation                                          | 0.235 (0.186, 0.283)                                 | 2493           |
| Primary lithology: Siliceous sandstone                         |                                                      |                |
| Buttermilk Falls Limestone through Esopus Formation, undivided | 1.026 (0.929, 1.123)                                 | 866            |
| Primary lithology: Siltstone                                   |                                                      |                |
| Beaverdam Run Member of Catskill Formation                     | 1.373 (1.253, 1.493)                                 | 381            |
| Brallier and Harrell Formations, undivided                     | 0.574 (0.501, 0.648)                                 | 2964           |
| Buddys Run Member of Catskill Formation                        | 0.767 (0.624, 0.909)                                 | 252            |
| Chadakoin Formation                                            | 0.320 (0.203, 0.436)                                 | 4003           |
| Cuyahoga Group                                                 | 0.318 (0.225, 0.411)                                 | 1909           |
| Irish Valley Member of Catskill Formation                      | 0.947 (0.877, 1.017)                                 | 2105           |
| Scherr Formation                                               | 0.516 (0.339, 0.693)                                 | 149            |
| Trimmers Rock Formation                                        | 0.941 (0.875, 1.006)                                 | 4360           |
| Venango Formation                                              | 0.541 (0.419, 0.663)                                 | 1814           |
| Primary lithology: Silty mudstone                              |                                                      |                |
| Gettysburg Formation                                           | -0.063 (-0.095, -0.030)                              | 6772           |
| Primary lithology: Slate                                       |                                                      |                |
| Peach Bottom Slate and Cardiff Conglomerate, undivided         | 0.845 (0.534, 1.155)                                 | 42             |
| <b>Intercept</b>                                               | <b>3.493 (3.414, 3.573)</b>                          | <b>866,735</b> |

<sup>a</sup>Model 1A was adjusted for: test year (1989-2013); test location (basement or first floor); well water use (yes or no); 13 building types (including “unknown”); test type (activated charcoal, alpha-track detectors, charcoal liquid scintillation, continuous radon monitors, and electret ion chamber); test duration; season (Spring: March-May, Summer: June-August, Fall: September-November, and Winter: December-February); weather (average temperature and rainfall for 10 regions during month radon measurement began with linear, quadratic and cubic terms to account for nonlinearity); minor civil division (township, borough, or city); county (n = 67); and 179 mutually exclusive geologic units (reference group = Stockton Formation [n = 62,026] and 12 geologic units with less than 20 measurements). <sup>b</sup>Geologic unit names from Pennsylvania Geological Survey, 2001. <sup>c</sup>The reference group for geologic unit contained observations from the Stockton Formation (n = 62,026) and 12 geologic units with <20 observations: the Shenango Formation through Cuyahoga Group, undivided (n = 19); the Conemaugh Group (n = 15); the Valentine Member of Benner Formation (n = 15); the Keyser Formation through Clinton Group, undivided (n = 11); the Allegheny and Pottsville Formations, undivided (n = 6); the Berry Run and Sawmill Run Members of Catskill Formation, undivided (n = 5); the Shriver, Mandata, Corriganville, and New Creek Members of Old Port Formation, undivided (n = 5); the Wills Creek Formation through Mifflintown Formation, undivided (n = 4); the Metagabbro (n = 3); the Juniata and Bald Eagle Formations, undivided (n = 2); the Sands of Presque Isle (n = 2); and the Wakefield Marble (n = 1).

**Table S3.** Predictors and 95% confidence intervals of *ln*-transformed basement radon concentrations from a linear regression model fit using generalized estimating equations including measurements from up to 4 test dates per building, 1989-2013.

| <b>Variable</b>    | <b>Model 1B<sup>a</sup><br/>Coefficient (95% CI)</b> | <b>N</b>  |
|--------------------|------------------------------------------------------|-----------|
| <b>Test number</b> |                                                      |           |
| 1                  | Reference                                            | 713,030   |
| 2                  | -0.463 (-0.467, -0.458)                              | 212,378   |
| 3                  | -0.724 (-0.732, -0.716)                              | 67,049    |
| 4                  | -0.867 (-0.880, -0.854)                              | 23,307    |
| <b>Intercept</b>   | 4.106 (4.024, 4.189)                                 | 1,015,764 |

<sup>a</sup>Model 1B was adjusted for: test year (1989-2013); well water use (yes or no); 13 building types (including “unknown”); test type (activated charcoal, alpha-track detectors, charcoal liquid scintillation, continuous radon monitors, and electret ion chamber); test duration; season (Spring: March-May, Summer: June-August, Fall: September-November, and Winter: December-February); weather (average temperature and rainfall for 10 regions during month radon measurement began with linear, quadratic and cubic terms to account for nonlinearity); minor civil division (township, borough, or city); county (n = 67); and 179 mutually exclusive geologic units (reference group = Stockton Formation [n = 62,026] and 11 geologic units with less than 20 measurements: Valentine Member of Benner Formation [n = 18]; Keyser Formation through Clinton Group, undivided [n = 16]; Conemaugh Group [n = 16]; Berry Run and Sawmill Run Members of Catskill Formation, undivided [n = 9]; Shriver, Mandata, Corriganville, and New Creek Members of Old Port Formation, undivided [n = 6]; Wills Creek Formation through Mifflintown Formation, undivided [n = 6]; Allegheny and Pottsville Formations, undivided [n = 4]; Juniata and Bald Eagle Formations, undivided [n = 3]; Sands of Presque Isle [n = 2]; Metagabbro [n = 2]; and Wakefield Marble [n = 1]).

**Table S4.** Predictors and 95% confidence intervals of *ln*-transformed basement radon concentrations from a linear regression model fit using generalized estimating equations including measurements from up to 4 test dates per building when the first basement radon test at the building was very high (i.e.,  $\geq 740$  Bq/m<sup>3</sup>), 1989-2013.

| <b>Variable</b>    | <b>Model 1B<sup>a</sup><br/>Coefficient (95% CI)</b> | <b>N</b> |
|--------------------|------------------------------------------------------|----------|
| <b>Test number</b> |                                                      |          |
| 1                  | Reference                                            | 55,123   |
| 2                  | -2.185 (-2.200, -2.170)                              | 28,342   |
| 3                  | -2.561 (-2.583, -2.538)                              | 11,093   |
| 4                  | -2.656 (-2.688, -2.623)                              | 4,662    |
| <b>Intercept</b>   | 7.053 (6.792, 7.314)                                 | 99,220   |

<sup>a</sup>The restricted model 1B was adjusted for: test year (1989-2013); well water use (yes or no); 13 building types (including “unknown”); test type (activated charcoal, alpha-track detectors, charcoal liquid scintillation, continuous radon monitors, and electret ion chamber); test duration; season (Spring: March-May, Summer: June-August, Fall: September-November, and Winter: December-February); weather (average temperature and rainfall for 10 regions during month radon measurement began with linear, quadratic and cubic terms to account for nonlinearity); minor civil division (township, borough, or city); county (n = 67); and 179 mutually exclusive geologic units (reference group = Stockton Formation [n = 62,026] and the 11 geologic units with less than 20 measurements in model 1B).
